# Supplementary material for: Crystal alignment of a LiFePO4 cathode material for lithium ion batteries using its magnetic properties
Source: Royal Society of Chemistry journal article supplement (doi:10.1039/c9ra05284d), 2019-01-01
Supplement: c9ra05284d1.pdf [file c9ra05284d1.pdf]

## Electronic Supplementary Information (ESI)

# Crystal alignment of an $\text{LiFePO}_4$ cathode material for lithium ion batteries using its magnetic properties

Cham Kim<sup>1\*</sup>, Yeokyung Yang<sup>1</sup>, Dongwoo Ha<sup>2</sup>, Dong Hwan Kim<sup>1</sup> and Hoyoung Kim<sup>1</sup>

<sup>1</sup> DGIST, 333 Techno Jungang-daero, Daegu, 42988, Republic of Korea

<sup>2</sup> KERI, 12 Bulmosan-ro 10beon-gil, Changwon, Gyeongsangnam-do, 51543, Republic of Korea

---

\* Corresponding author (Cham Kim).

Tel.: +82-53-785-3602

Fax: +82-53-785-3609

E-mail: charming0207@dgist.ac.kr

ESI 1: Crystal alignment process

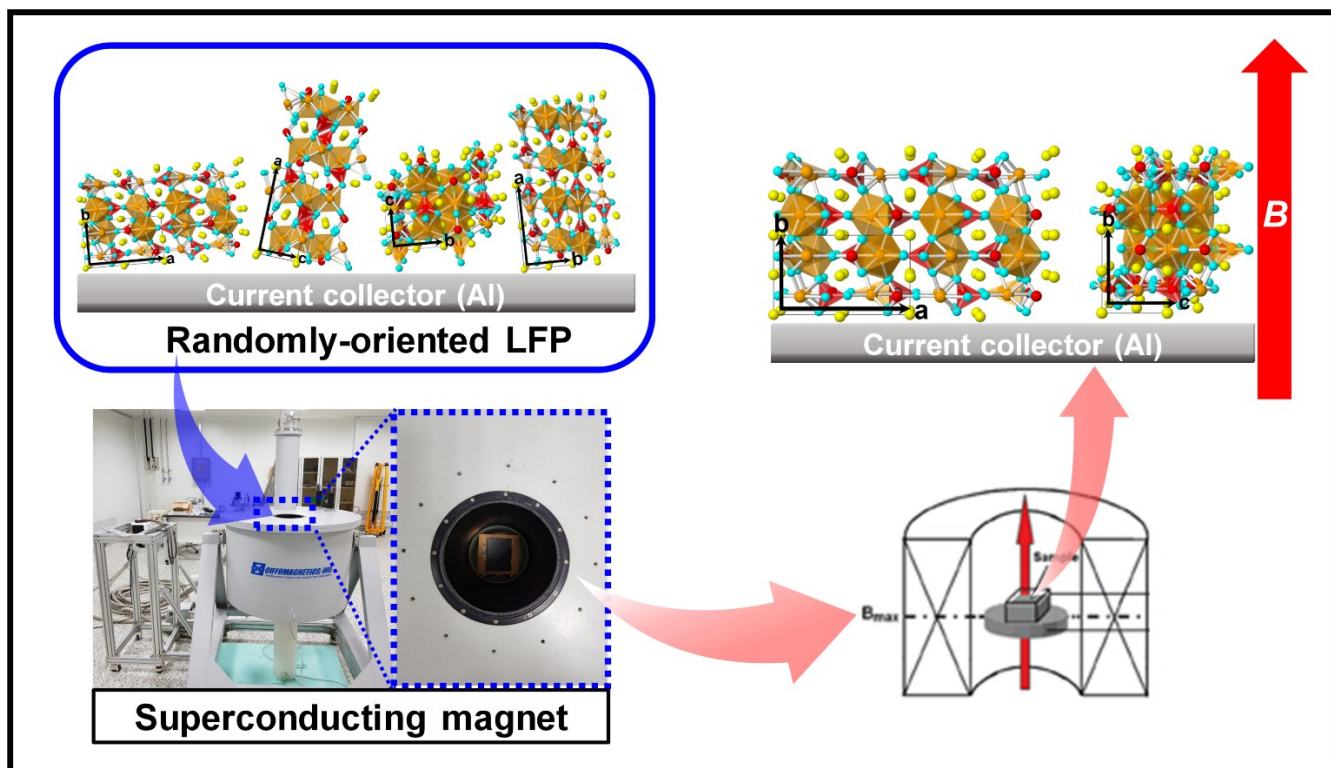

Fig. S1. Crystal alignment process for a randomly-oriented  $\text{LiFePO}_4$  film, in which a magnetic field is applied perpendicular to a current collector by using a superconducting magnet, possibly resulting in the b-axis of  $\text{LiFePO}_4$  aligned parallel to the magnetic field.

## ESI 2: X-ray diffraction data

Table S1. Intensities of the ( $hkl$ ) planes for the fabricated (LFP, mf-LFP) and randomly-oriented  $\text{LiFePO}_4$  (JCPDS card No. 83-2092).  $p$  and  $p_0$  values indicate the intensity fractions of ( $0k0$ ) planes for the fabricated and randomly-oriented samples, respectively.

| $hkl$ | LFP<br>( $p = 0.1176$ ) | mf-LFP<br>( $p = 0.4933$ ) | JCPDS card No. 83-2092<br>( $p_0 = 0.1122$ ) |
|-------|-------------------------|----------------------------|----------------------------------------------|
|       | $I(hkl)$                | $I(hkl)$                   | $I_0(hkl)$                                   |
| 200   | 217                     | 270                        | 38                                           |
| 101   | 377                     | 345                        | 76                                           |
| 210   | 283                     | 503                        | 24                                           |
| 011   | 225                     | 405                        | 9                                            |
| 111   | 448                     | 613                        | 83                                           |
| 020   | 565                     | 6930                       | 78                                           |
| 301   | 180                     | 180                        | 31                                           |
| 311   | 575                     | 605                        | 100                                          |
| 121   | 222                     | 547                        | 31                                           |
| 410   | 167                     | 198                        | 22                                           |
| 102   | 102                     | 117                        | 13                                           |
| 401   | 145                     | 267                        | 18                                           |
| 112   | 122                     | 96                         | 16                                           |
| 321   | 58                      | 112                        | 6                                            |
| 212   | 37                      | 54                         | 4                                            |
| 022   | 72                      | 113                        | 12                                           |
| 511   | 108                     | 305                        | 7                                            |
| 222   | 200                     | 263                        | 31                                           |
| 412   | 95                      | 83                         | 15                                           |
| 610   | 127                     | 145                        | 17                                           |
| 331   | 135                     | 385                        | 20                                           |
| 430   | 87                      | 242                        | 11                                           |
| 113   | 137                     | 800                        | 16                                           |
| 620   | 120                     | 470                        | 17                                           |

### ESI 3: Magnetic and physical properties

Table S2. Magnetic and physical properties of the LiFePO<sub>4</sub> crystal, which were used to calculate the minimum magnetic flux density ( $B$ , Eq. 4) required for rotating the crystal.

| Quantity | <sup>a</sup> Gaussian unit                 | Conversion factor     | SI unit                                                         |
|----------|--------------------------------------------|-----------------------|-----------------------------------------------------------------|
| $\chi_m$ | $8.45 \times 10^{-3} \text{ emu mol}^{-1}$ | $4\pi \times 10^{-6}$ | <sup>b</sup> $1.06 \times 10^{-7} \text{ m}^3 \text{ mol}^{-1}$ |
| $V$      | –                                          | –                     | $3.05 \times 10^{-15} \text{ m}^3$                              |
| $\mu_0$  | 1 (dimensionless)                          | $4\pi \times 10^{-7}$ | $4\pi \times 10^{-7} \text{ H m}^{-1}$                          |
| $k_B$    | –                                          | –                     | $1.38 \times 10^{-23} \text{ J K}^{-1}$                         |
| $T$      | –                                          | –                     | 298 K                                                           |
| $B$      | –                                          | –                     | $3.74 \times 10^{-5} \text{ Wb m}^{-2} (=T)$                    |

<sup>a</sup> Quantities in Gaussian unit are multiplied by conversion factors to convert to those in SI unit.<sup>1-3</sup>

<sup>b</sup> The molar susceptibility ( $\chi_m$ ) is converted to a dimensionless susceptibility ( $\chi$ ) by using the theoretical density ( $\rho$ ) and molecular weight ( $M$ ) of LiFePO<sub>4</sub> (i.e.,  $\chi = (\rho/M)\chi_m$ ).

## References

- 1 D. R. Lide, *CRC Handbook of Chemistry and Physics*, CRC Press, Boca Raton, 2003.
- 2 V. K. Varadan, L. Chen and J. Xie, *Nanomedicine: Design and Applications of Magnetic Nanomaterials, Nanosensors and Nanosystems*, John Wiley & Sons, Chichester, 2008.
- 3 N. Darton, A. Ionescu and J. Llandro, *Magnetic Nanoparticles in Biosensing and Medicine*, Cambridge University Press, Cambridge, 2019.
